# Supplementary material
Source: MDPI journal article supplement (https://www.mdpi.com/2673-9879/2/3/18)
Supplement: s1 [file s1 › futurepharmacol-1804713-supplementary.pdf]

# Supplementary Materials: The Pharmacogenetics of Treatment with Quetiapine

María Ortega-Ruiz, Paula Soria-Chacartegui, Gonzalo Villapalos-García, Francisco Abad-Santos and Pablo Zubiaur

**Table S1.** List of screened publications, ordered by year of publication.

| Publications Supporting Annotations | Year        | doi                                       |
|-------------------------------------|-------------|-------------------------------------------|
| <b>Campbell et al.</b>              | <b>2008</b> | <b>10.1016/j.biopsych.2007.04.018</b>     |
| <i>Tiwari et al.</i>                | <i>2010</i> | <i>10.1038/npp.2009.235</i>               |
| <b>Monteleone et al.</b>            | <b>2010</b> | <b>10.1097/JCP.0b013e3181e742c5</b>       |
| <i>Opgen-Rhein et al.</i>           | <i>2010</i> | <i>10.2217/pgs.10.50</i>                  |
| <b>Malhotra et al.</b>              | <b>2012</b> | <b>10.1001/archgenpsychiatry.2012.191</b> |
| <b>Crisafulli et al.</b>            | <b>2012</b> | <b>10.1007/s00406-011-0278-3</b>          |
| <i>Liu et al.</i>                   | <i>2012</i> | <i>10.2217/pgs.12.105</i>                 |
| <b>Czerwensky et al.</b>            | <b>2013</b> | <b>10.1017/S1461145713000849</b>          |
| <i>Nurmi et al.</i>                 | <i>2013</i> | <i>10.1038/tp.2013.26</i>                 |
| <b>Clark et al.</b>                 | <b>2013</b> | <b>10.1097/FPC.0b013e32835ca260</b>       |
| <b>López-Rodríguez et al.</b>       | <b>2013</b> | <b>10.2217/pgs.13.106</b>                 |
| <b>Kim et al.</b>                   | <b>2014</b> | <b>10.1097/FPC.0000000000000020</b>       |
| <i>Drago Antonio et al.</i>         | <i>2014</i> | <i>10.1097/FPC.0000000000000052</i>       |
| <b>van der Weide et al.</b>         | <b>2014</b> | <b>10.1097/JCP.0000000000000070</b>       |
| <b>Cabaleiro et al.</b>             | <b>2015</b> | <b>10.1097/YIC.0000000000000047</b>       |
| <b>Xu et al.</b>                    | <b>2016</b> | <b>10.1038/tpj.2015.61</b>                |
| <b>Porcelli Stefano et al.</b>      | <b>2016</b> | <b>10.1159/000445295</b>                  |
| <b>Delacretaz et al.</b>            | <b>2017</b> | <b>10.1016/j.gene.2017.07.005</b>         |
| <i>Puangpetch et al.</i>            | <i>2018</i> | <i>10.1111/jphp.12892</i>                 |
| <b>Saiz-Rodríguez et al.</b>        | <b>2020</b> | <b>10.3390/biomedicines8040094</b>        |
| <i>Xu et al.</i>                    | <i>2020</i> | <i>10.3389/fphar.2020.00007</i>           |
| <b>Zubiaur et al.</b>               | <b>2021</b> | <b>10.3390/pharmaceutics13101573</b>      |

In bold, the included publications; in italics, the excluded publications.

**Table S2.** List of screened annotations ordered by gene.

| Gene                 | Year | Paper                        | Annotation                                                                                                                                                                                                                    |
|----------------------|------|------------------------------|-------------------------------------------------------------------------------------------------------------------------------------------------------------------------------------------------------------------------------|
| CNR1<br>rs1049353    | 2013 | 10.1038/tp.2013.26           | Allele C is associated with increased risk of weight gain when exposed to risperidone in children with Autism Spectrum Disorder as compared to allele T.                                                                      |
|                      | 2010 | 10.1038/npp.2009.235         | Genotype CC is associated with decreased likelihood of weight gain when treated with clozapine or olanzapine in people with Schizophrenia as compared to genotype CT.                                                         |
|                      | 2010 | 10.1097/JCP.0b013e3181e742c5 | Allele T is not associated with increased likelihood of Weight gain when treated with aripiprazole, clozapine, haloperidol, olanzapine, quetiapine or risperidone in people with Psychotic Disorders as compared to allele C. |
| COMT                 | 2016 | 10.1038/tpj.2015.61          | rs5993883 T is associated with decreased response to quetiapine in people with Schizophrenia as compared to allele G                                                                                                          |
|                      | 2016 | 10.1038/tpj.2015.61          | rs4818 C allele is associated with decreased response to quetiapine in people with Schizophrenia as compared to allele G.                                                                                                     |
|                      | 2016 | 10.1038/tpj.2015.61          | rs6269 A is associated with decreased response to quetiapine in people with Schizophrenia as compared to allele G.                                                                                                            |
| CYP3A4               | 2014 | 10.1097/JCP.0000000000000070 | CYP3A4 *1/*22 + *22/*22 is associated with increased concentrations of quetiapine in people with Psychotic Disorders as compared to CYP3A4 *1/*1.                                                                             |
|                      | 2020 | 10.3390/biomedicines8040094  | CYP3A4 *3 + *20 + *22 are associated with increased exposure to fentanyl, imatinib or quetiapine in healthy individuals as compared to CYP3A4 *1.                                                                             |
| CYP3A5               | 2014 | 10.1097/FPC.0000000000000020 | rs776746 CC genotype is associated with decreased metabolism of quetiapine in healthy individuals as compared to genotypes CT + TT.                                                                                           |
| DRD3<br>rs6280       | 2015 | 10.1097/YIC.0000000000000047 | Genotype TT is associated with increased clearance of quetiapine in healthy individuals as compared to genotypes CC + CT.                                                                                                     |
| EIF2AK4<br>rs2412459 | 2014 | 10.1097/FPC.0000000000000052 | Genotype CT is associated with increased response to olanzapine, quetiapine, risperidone or ziprasidone in people with Schizophrenia as compared to genotype TT ( $p > 0.05$ )                                                |
| EPM2A<br>rs1415744   | 2016 | 10.1159/000445295            | Allele C is associated with increased response to chlorpromazine, clozapine, haloperidol, olanzapine, quetiapine, risperidone or trifluoperazine in people with Schizophrenia as compared to allele T.                        |
| FAAH<br>rs324420     | 2010 | 10.1097/JCP.0b013e3181e742c5 | Allele A is associated with increased likelihood of Weight gain when treated with aripiprazole, clozapine, haloperidol, olanzapine, quetiapine or risperidone in people with Psychotic Disorders as compared to allele C.     |
|                      | 2013 | 10.1038/tp.2013.26           | Allele A is not associated with risk of Weight gain when exposed to risperidone in children with Autism Spectrum Disorder as compared to allele C                                                                             |
| GRIN2B<br>rs1806201  | 2013 | 10.2217/pgs.13.106           | Genotype AA is associated with increased likelihood of sleepiness when treated with quetiapine in healthy individuals as compared to genotypes AG + GG.                                                                       |
|                      | 2013 | 10.2217/pgs.13.106           | Genotype AA is associated with increased neurological adverse reactions when treated with quetiapine in healthy individuals as compared to genotypes AG + GG                                                                  |
| HTR1A                | 2012 | 10.1007/s00406-011-0278-3    | Genotype TT is associated with increased response to amisulpride, antipsychotics, olanzapine, quetiapine or risperidone in people with Schizophrenia as compared to genotypes CC + CT                                         |
| MC4R                 | 2013 | 10.1017/S1461145713000849    | rs17782313 genotype CC is associated with increased risk of Weight gain when exposed to amisulpride, clozapine, olanzapine, paliperidone, quetiapine or risperidone as compared to genotypes CT + TT.                         |

|                                              |      |                                    |                                                                                                                                                                                                                                                                                                                                                                                                   |
|----------------------------------------------|------|------------------------------------|---------------------------------------------------------------------------------------------------------------------------------------------------------------------------------------------------------------------------------------------------------------------------------------------------------------------------------------------------------------------------------------------------|
|                                              | 2012 | 10.1001/archgenpsychiatry.2012.191 | rs489693 genotype is associated with increased likelihood of Hypertriglyceridemia and Weight gain when exposed to amisulpride, aripiprazole, clozapine, haloperidol, quetiapine, risperidone or ziprasidone in people with schizoaffective disorder and Schizophrenia as compared to genotypes AC + CC.                                                                                           |
|                                              | 2013 | 10.1017/S1461145713000849          | rs489693 genotype AA is associated with increased risk of Weight gain when exposed to amisulpride, clozapine, olanzapine, paliperidone, quetiapine or risperidone as compared to genotypes AC + CC.                                                                                                                                                                                               |
| <i>MIR582;</i><br><i>PDE4D</i><br>rs17742120 | 2013 | 10.1097/FPC.0b013e32835ca260       | rs17742120 allele G is associated with increased response to quetiapine in people with Schizophrenia as compared to allele A.                                                                                                                                                                                                                                                                     |
| <i>PDE4D</i>                                 | 2013 | 10.1097/FPC.0b013e32835ca260       | rs2164660 allele A is associated with increased response to quetiapine in people with Schizophrenia as compared to allele G                                                                                                                                                                                                                                                                       |
| <i>PDE4D</i>                                 | 2013 | 10.1097/FPC.0b013e32835ca260       | rs17382202 allele T is associated with increased response to quetiapine in people with Schizophrenia as compared to allele C.                                                                                                                                                                                                                                                                     |
| <i>RABEP1</i>                                | 2017 | 10.1016/j.gene.2017.07.005         | Genotypes AG + GG is associated with decreased concentrations of glucose in people with Bipolar Disorder, Depressive Disorder, Psychotic Disorders and schizoaffective disorder as compared to genotype AA                                                                                                                                                                                        |
| <i>RGS4</i><br>rs951439                      | 2008 | 10.1016/j.biopsych.2007.04.018     | Genotype CC is associated with increased likelihood of positive response when treated with olanzapine and perphenazine in people with Schizophrenia as compared to genotypes CT + TT.                                                                                                                                                                                                             |
|                                              | 2008 | 10.1016/j.biopsych.2007.04.018     | Genotype CT is associated with increased likelihood of response when treated with olanzapine in people with Schizophrenia                                                                                                                                                                                                                                                                         |
|                                              | 2008 | 10.1016/j.biopsych.2007.04.018     | Genotype TT is associated with increased response to quetiapine and ziprasidone in people with Schizophrenia as compared to genotype CC                                                                                                                                                                                                                                                           |
| <i>SH2B1</i><br>rs3888190                    | 2017 | 10.1016/j.gene.2017.07.005         | Genotype CC is associated with increased concentrations of low density lipoprotein in people with Bipolar Disorder, Depressive Disorder, Psychotic Disorders or schizoaffective disorder as compared to genotypes AA + AC.in patients who were administered amisulpride, aripiprazole, clozapine, olanzapine, quetiapine, paliperidone, risperidone, lithium, or valproate and or/and mirtazapine |
| rs7912580                                    | 2013 | 10.1097/FPC.0b013e32835ca260       | Genotype AG is associated with increased response to olanzapine, quetiapine, risperidone or ziprasidone in people with Schizophrenia as compared to genotype GG.                                                                                                                                                                                                                                  |
